# Supplementary material for: High density and successful breeding of Turtle doves Streptopelia turtur in Moroccan olive groves
Source: PeerJ. 2022 Nov 11;10:e14375. doi: 10.7717/peerj.14375 (PMC9661970; doi:10.7717/peerj.14375)
Supplement: Supplemental Information 1 — Equally, the occurrence habitat of Turtle doves in the plain of Sais and controlling factors. [file peerj-10-14375-s001.xlsx]

## Sheet: Habitat use raw
Season	Weeks	Cereal plots	Olive groves	Cereals-Olives	Urban habitat	Cereals-Olives-Urban	Aquatic habitats
		CP	OG	CO	UH	COH	AH	CP
2018	2001-03-01	0	0	1	0	0	0	OG
2018	2001-03-01	0	0	1	0	0	0	CO
2018	2001-03-01	0	0	1	0	0	0	UH
2018	2001-03-01	0	0	1	0	0	0	COH
2018	2001-03-01	0	0	1	0	0	0	AH
2018	2001-03-01	1	0	0	0	0	0
2018	2001-03-01	1	0	0	0	0	0
2018	2001-03-01	0	0	1	0	0	0
2018	2001-03-01	0	0	1	0	0	0
2018	2001-03-01	0	0	0	1	0	0
2018	2001-03-01	0	0	0	1	0	0
2018	2001-03-01	0	0	0	0	1	0
2018	2001-03-01	0	0	1	0	0	0
2018	2001-03-01	1	0	0	0	0	0
2018	2001-03-01	1	0	0	0	0	0
2018	2001-03-01	1	0	0	0	0	0
2018	2001-03-01	1	0	1	0	0	0
2018	2001-03-01	1	0	0	0	0	0
2018	2001-03-01	1	0	0	0	0	0
2018	2001-03-01	0	0	0	0	0	1
2019	2001-03-01	1	1	1	0	0	0
2019	2001-03-01	1	1	1	0	0	0
2019	2001-03-01	1	1	1	0	0	0
2019	2001-03-01	1	1	1	0	0	0
2019	2001-03-01	0	0	0	0	1	0
2019	2001-03-01	1	0	0	0	0	0
2019	2001-03-01	0	0	1	0	0	0
2019	2001-03-01	0	0	0	0	0	0
2019	2001-03-01	0	0	0	0	0	0
2019	2001-03-01	0	0	0	0	0	0
2019	2001-03-01	0	0	1	0	0	15
2019	2001-03-01	1	0	0	0	0	0
2019	2001-03-01	1	0	0	0	0	0
2019	2001-03-01	0	0	1	0	0	0
2019	2001-03-01	0	0	0	0	0	0
2019	2001-03-01	0	0	0	0	0	0
2019	2001-03-01	1	0	0	0	0	0
2019	2001-03-01	0	0	0	0	0	1
2019	2001-03-01	0	0	0	0	0	0
2018	2002-03-01	0	0	1	0	0	0
2018	2002-03-01	0	0	1	0	0	0
2018	2002-03-01	0	0	1	0	0	0
2018	2002-03-01	0	0	1	0	0	0
2018	2002-03-01	0	0	1	0	0	0
2018	2002-03-01	1	0	0	0	0	0
2018	2002-03-01	1	0	0	0	0	0
2018	2002-03-01	0	0	1	0	0	0
2018	2002-03-01	0	0	1	0	0	0
2018	2002-03-01	0	0	0	1	0	0
2018	2002-03-01	0	0	0	1	0	0
2018	2002-03-01	0	0	0	0	1	0
2018	2002-03-01	0	0	1	0	0	0
2018	2002-03-01	1	0	0	0	0	0
2018	2002-03-01	1	0	0	0	0	0
2018	2002-03-01	1	0	0	0	0	0
2018	2002-03-01	1	0	1	0	0	0
2018	2002-03-01	1	0	0	0	0	0
2018	2002-03-01	1	0	0	0	0	0
2018	2002-03-01	0	0	0	0	0	1
2019	2002-03-01	1	1	1	0	0	0
2019	2002-03-01	1	1	1	0	0	0
2019	2002-03-01	1	1	1	0	0	0
2019	2002-03-01	1	1	1	0	0	0
2019	2002-03-01	0	0	0	0	1	0
2019	2002-03-01	1	0	0	0	0	0
2019	2002-03-01	0	0	1	0	0	0
2019	2002-03-01	0	0	0	0	0	0
2019	2002-03-01	0	0	0	0	0	0
2019	2002-03-01	0	0	0	0	0	0
2019	2002-03-01	0	0	1	0	0	15
2019	2002-03-01	1	0	0	0	0	0
2019	2002-03-01	1	0	0	0	0	0
2019	2002-03-01	0	0	1	0	0	0
2019	2002-03-01	0	0	0	0	0	0
2019	2002-03-01	0	0	0	0	0	0
2019	2002-03-01	1	0	0	0	0	0
2019	2002-03-01	0	0	0	0	0	1
2019	2002-03-01	0	0	1	0	0	0
2018	2003-03-01	0	0	1	0	0	0
2018	2003-03-01	0	0	1	0	0	0
2018	2003-03-01	0	0	1	0	0	0
2018	2003-03-01	0	0	1	0	0	0
2018	2003-03-01	0	0	1	0	0	0
2018	2003-03-01	1	0	0	0	0	0
2018	2003-03-01	1	0	0	0	0	0
2018	2003-03-01	0	0	1	0	0	0
2018	2003-03-01	0	0	1	0	0	0
2018	2003-03-01	0	0	0	1	0	0
2018	2003-03-01	0	0	0	1	0	0
2018	2003-03-01	0	0	0	0	1	0
2018	2003-03-01	0	0	1	0	0	0
2018	2003-03-01	1	0	0	0	0	0
2018	2003-03-01	1	0	0	0	0	0
2018	2003-03-01	1	0	0	0	0	0
2018	2003-03-01	1	0	1	0	0	0
2018	2003-03-01	1	0	0	0	0	0
2018	2003-03-01	1	0	0	0	0	0
2018	2003-03-01	0	0	0	0	0	1
2019	2003-03-01	1	1	1	0	0	0
2019	2003-03-01	1	1	1	0	0	0
2019	2003-03-01	1	1	1	0	0	0
2019	2003-03-01	1	1	1	0	0	0
2019	2003-03-01	0	0	0	0	1	0
2019	2003-03-01	1	0	0	0	0	0
2019	2003-03-01	0	0	1	0	0	0
2019	2003-03-01	0	0	0	0	0	0
2019	2003-03-01	0	0	0	0	0	0
2019	2003-03-01	0	0	0	0	0	0
2019	2003-03-01	0	0	1	0	0	15
2019	2003-03-01	1	0	0	0	0	0
2019	2003-03-01	1	0	0	0	0	0
2019	2003-03-01	0	0	1	0	0	0
2019	2003-03-01	0	0	0	0	0	0
2019	2003-03-01	0	0	0	0	0	0
2019	2003-03-01	1	0	0	0	0	0
2019	2003-03-01	0	0	0	0	0	1
2019	2003-03-01	0	0	1	0	0	0
2018	2004-03-01	0	0	1	0	0	0
2018	2004-03-01	0	0	1	0	0	0
2018	2004-03-01	0	0	1	0	0	0
2018	2004-03-01	0	0	1	0	0	0
2018	2004-03-01	0	0	1	0	0	0
2018	2004-03-01	1	0	0	0	0	0
2018	2004-03-01	1	0	0	0	0	0
2018	2004-03-01	0	0	1	0	0	0
2018	2004-03-01	0	0	1	0	0	0
2018	2004-03-01	0	0	0	1	0	0
2018	2004-03-01	0	0	0	1	0	0
2018	2004-03-01	0	0	0	0	1	0
2018	2004-03-01	0	0	1	0	0	0
2018	2004-03-01	1	0	0	0	0	0
2018	2004-03-01	1	0	0	0	0	0
2018	2004-03-01	1	0	0	0	0	0
2018	2004-03-01	1	0	1	0	0	0
2018	2004-03-01	1	0	0	0	0	0
2018	2004-03-01	1	0	0	0	0	0
2018	2004-03-01	0	0	0	0	0	1
2019	2004-03-01	1	1	1	0	0	0
2019	2004-03-01	1	1	1	0	0	0
2019	2004-03-01	1	1	1	0	0	0
2019	2004-03-01	1	1	1	0	0	0
2019	2004-03-01	0	0	0	0	1	0
2019	2004-03-01	1	0	0	0	0	0
2019	2004-03-01	0	0	1	0	0	0
2019	2004-03-01	0	0	0	0	0	0
2019	2004-03-01	0	0	0	0	0	0
2019	2004-03-01	0	0	0	0	0	0
2019	2004-03-01	0	0	1	0	0	15
2019	2004-03-01	1	0	0	0	0	0
2019	2004-03-01	1	0	0	0	0	0
2019	2004-03-01	0	0	1	0	0	0
2019	2004-03-01	0	0	0	0	0	0
2019	2004-03-01	0	0	0	0	0	0
2019	2004-03-01	1	0	0	0	0	0
2019	2004-03-01	0	0	0	0	0	1
2018	2001-04-01	0	0	1	0	0	0
2018	2001-04-01	0	0	1	0	0	0
2018	2001-04-01	0	0	1	0	0	0
2018	2001-04-01	0	0	1	0	0	0
2018	2001-04-01	0	0	1	0	0	0
2018	2001-04-01	0	0	1	0	0	0
2018	2001-04-01	1	0	0	0	0	0
2018	2001-04-01	1	0	0	0	0	0
2018	2001-04-01	0	0	1	0	0	0
2018	2001-04-01	0	0	1	0	0	0
2018	2001-04-01	0	0	0	1	0	0
2018	2001-04-01	0	0	0	1	0	0
2018	2001-04-01	0	0	0	0	1	0
2018	2001-04-01	0	0	1	0	0	0
2018	2001-04-01	1	0	0	0	0	0
2018	2001-04-01	1	0	0	0	0	0
2018	2001-04-01	1	0	0	0	0	0
2018	2001-04-01	1	0	1	0	0	0
2018	2001-04-01	1	0	0	0	0	0
2018	2001-04-01	1	0	0	0	0	0
2019	2001-04-01	0	0	0	0	0	1
2019	2001-04-01	1	1	1	0	0	0
2019	2001-04-01	1	1	1	0	0	0
2019	2001-04-01	1	1	1	0	0	0
2019	2001-04-01	1	1	1	0	0	0
2019	2001-04-01	0	0	0	0	1	0
2019	2001-04-01	1	0	0	0	0	0
2019	2001-04-01	0	0	1	0	0	0
2019	2001-04-01	0	0	0	0	0	0
2019	2001-04-01	0	0	0	0	0	0
2019	2001-04-01	0	0	0	0	0	0
2019	2001-04-01	0	0	1	0	0	15
2019	2001-04-01	1	0	0	0	0	0
2019	2001-04-01	1	0	0	0	0	0
2019	2001-04-01	0	0	1	0	0	0
2019	2001-04-01	0	0	0	0	0	0
2019	2001-04-01	0	0	0	0	0	0
2019	2001-04-01	1	0	0	0	0	0
2018	2002-04-01	0	0	0	0	0	1
2018	2002-04-01	0	0	1	0	0	0
2018	2002-04-01	0	0	1	0	0	0
2018	2002-04-01	0	0	1	0	0	0
2018	2002-04-01	0	0	1	0	0	0
2018	2002-04-01	0	0	1	0	0	0
2018	2002-04-01	0	0	1	0	0	0
2018	2002-04-01	1	0	0	0	0	0
2018	2002-04-01	1	0	0	0	0	0
2018	2002-04-01	0	0	1	0	0	0
2018	2002-04-01	0	0	1	0	0	0
2018	2002-04-01	0	0	0	1	0	0
2018	2002-04-01	0	0	0	1	0	0
2018	2002-04-01	0	0	0	0	1	0
2018	2002-04-01	0	0	1	0	0	0
2018	2002-04-01	1	0	0	0	0	0
2018	2002-04-01	1	0	0	0	0	0
2018	2002-04-01	1	0	0	0	0	0
2018	2002-04-01	1	0	1	0	0	0
2018	2002-04-01	1	0	0	0	0	0
2019	2002-04-01	1	0	0	0	0	0
2019	2002-04-01	0	0	0	0	0	1
2019	2002-04-01	1	1	1	0	0	0
2019	2002-04-01	1	1	1	0	0	0
2019	2002-04-01	1	1	1	0	0	0
2019	2002-04-01	1	1	1	0	0	0
2019	2002-04-01	0	0	0	0	1	0
2019	2002-04-01	1	0	0	0	0	0
2019	2002-04-01	0	0	1	0	0	0
2019	2002-04-01	0	0	0	0	0	0
2019	2002-04-01	0	0	0	0	0	0
2019	2002-04-01	0	0	0	0	0	0
2019	2002-04-01	0	0	1	0	0	15
2019	2002-04-01	1	0	0	0	0	0
2019	2002-04-01	1	0	0	0	0	0
2019	2002-04-01	0	0	1	0	0	0
2019	2002-04-01	0	0	0	0	0	0
2019	2002-04-01	0	0	0	0	0	0
2018	2003-04-01	1	0	0	0	0	0
2018	2003-04-01	0	0	0	0	0	1
2018	2003-04-01	0	0	1	0	0	0
2018	2003-04-01	0	0	1	0	0	0
2018	2003-04-01	0	0	1	0	0	0
2018	2003-04-01	0	0	1	0	0	0
2018	2003-04-01	0	0	1	0	0	0
2018	2003-04-01	0	0	1	0	0	0
2018	2003-04-01	1	0	0	0	0	0
2018	2003-04-01	1	0	0	0	0	0
2018	2003-04-01	0	0	1	0	0	0
2018	2003-04-01	0	0	1	0	0	0
2018	2003-04-01	0	0	0	1	0	0
2018	2003-04-01	0	0	0	1	0	0
2018	2003-04-01	0	0	0	0	1	0
2018	2003-04-01	0	0	1	0	0	0
2018	2003-04-01	1	0	0	0	0	0
2018	2003-04-01	1	0	0	0	0	0
2018	2003-04-01	1	0	0	0	0	0
2018	2003-04-01	1	0	1	0	0	0
2019	2003-04-01	1	0	0	0	0	0
2019	2003-04-01	1	0	0	0	0	0
2019	2003-04-01	0	0	0	0	0	1
2019	2003-04-01	1	1	1	0	0	0
2019	2003-04-01	1	1	1	0	0	0
2019	2003-04-01	1	1	1	0	0	0
2019	2003-04-01	1	1	1	0	0	0
2019	2003-04-01	0	0	0	0	1	0
2019	2003-04-01	1	0	0	0	0	0
2019	2003-04-01	0	0	1	0	0	0
2019	2003-04-01	0	0	0	0	0	0
2019	2003-04-01	0	0	0	0	0	0
2019	2003-04-01	0	0	0	0	0	0
2019	2003-04-01	0	0	1	0	0	15
2019	2003-04-01	1	0	0	0	0	0
2019	2003-04-01	1	0	0	0	0	0
2019	2003-04-01	0	0	1	0	0	0
2019	2003-04-01	0	0	0	0	0	0
2018	2004-04-01	0	0	0	0	0	0
2018	2004-04-01	1	0	0	0	0	0
2018	2004-04-01	0	0	0	0	0	1
2018	2004-04-01	0	0	1	0	0	0
2018	2004-04-01	0	0	1	0	0	0
2018	2004-04-01	0	0	1	0	0	0
2018	2004-04-01	0	0	1	0	0	0
2018	2004-04-01	0	0	1	0	0	0
2018	2004-04-01	0	0	1	0	0	0
2018	2004-04-01	1	0	0	0	0	0
2018	2004-04-01	1	0	0	0	0	0
2018	2004-04-01	0	0	1	0	0	0
2018	2004-04-01	0	0	1	0	0	0
2018	2004-04-01	0	0	0	1	0	0
2018	2004-04-01	0	0	0	1	0	0
2018	2004-04-01	0	0	0	0	1	0
2018	2004-04-01	0	0	1	0	0	0
2018	2004-04-01	1	0	0	0	0	0
2018	2004-04-01	1	0	0	0	0	0
2018	2004-04-01	1	0	0	0	0	0
2019	2004-04-01	1	0	1	0	0	0
2019	2004-04-01	1	0	0	0	0	0
2019	2004-04-01	1	0	0	0	0	0
2019	2004-04-01	0	0	0	0	0	1
2019	2004-04-01	1	1	1	0	0	0
2019	2004-04-01	1	1	1	0	0	0
2019	2004-04-01	1	1	1	0	0	0
2019	2004-04-01	1	1	1	0	0	0
2019	2004-04-01	0	0	0	0	1	0
2019	2004-04-01	1	0	0	0	0	0
2019	2004-04-01	0	0	1	0	0	0
2019	2004-04-01	0	0	0	0	0	0
2019	2004-04-01	0	0	0	0	0	0
2019	2004-04-01	0	0	0	0	0	0
2019	2004-04-01	0	0	1	0	0	15
2019	2004-04-01	1	0	0	0	0	0
2019	2004-04-01	1	0	0	0	0	0
2019	2004-04-01	0	0	1	0	0	0
2018	May-01	0	0	0	0	0	0
2018	May-01	0	0	0	0	0	0
2018	May-01	1	0	0	0	0	0
2018	May-01	0	0	0	0	0	1
2018	May-01	0	0	1	0	0	0
2018	May-01	0	0	1	0	0	0
2018	May-01	0	0	1	0	0	0
2018	May-01	0	0	1	0	0	0
2018	May-01	0	0	1	0	0	0
2018	May-01	0	0	1	0	0	0
2018	May-01	1	0	0	0	0	0
2018	May-01	1	0	0	0	0	0
2018	May-01	0	0	1	0	0	0
2018	May-01	0	0	1	0	0	0
2018	May-01	0	0	0	1	0	0
2018	May-01	0	0	0	1	0	0
2018	May-01	0	0	0	0	1	0
2018	May-01	0	0	1	0	0	0
2018	May-01	1	0	0	0	0	0
2018	May-01	1	0	0	0	0	0
2019	May-01	1	0	0	0	0	0
2019	May-01	1	0	1	0	0	0
2019	May-01	1	0	0	0	0	0
2019	May-01	1	0	0	0	0	0
2019	May-01	0	0	0	0	0	1
2019	May-01	1	1	1	0	0	0
2019	May-01	1	1	1	0	0	0
2019	May-01	1	1	1	0	0	0
2019	May-01	1	1	1	0	0	0
2019	May-01	0	0	0	0	1	0
2019	May-01	1	0	0	0	0	0
2019	May-01	0	0	1	0	0	0
2019	May-01	0	0	0	0	0	0
2019	May-01	0	0	0	0	0	0
2019	May-01	0	0	0	0	0	0
2019	May-01	0	0	1	0	0	15
2019	May-01	1	0	0	0	0	0
2019	May-01	1	0	0	0	0	0
2018	May-02	0	0	1	0	0	0
2018	May-02	0	0	0	0	0	0
2018	May-02	0	0	0	0	0	0
2018	May-02	1	0	0	0	0	0
2018	May-02	0	0	0	0	0	1
2018	May-02	0	0	1	0	0	0
2018	May-02	0	0	1	0	0	0
2018	May-02	0	0	1	0	0	0
2018	May-02	0	0	1	0	0	0
2018	May-02	0	0	1	0	0	0
2018	May-02	0	0	1	0	0	0
2018	May-02	1	0	0	0	0	0
2018	May-02	1	0	0	0	0	0
2018	May-02	0	0	1	0	0	0
2018	May-02	0	0	1	0	0	0
2018	May-02	0	0	0	1	0	0
2018	May-02	0	0	0	1	0	0
2018	May-02	0	0	0	0	1	0
2018	May-02	0	0	1	0	0	0
2018	May-02	1	0	0	0	0	0
2019	May-02	1	0	0	0	0	0
2019	May-02	1	0	0	0	0	0
2019	May-02	1	0	1	0	0	0
2019	May-02	1	0	0	0	0	0
2019	May-02	1	0	0	0	0	0
2019	May-02	0	0	0	0	0	1
2019	May-02	1	1	1	0	0	0
2019	May-02	1	1	1	0	0	0
2019	May-02	1	1	1	0	0	0
2019	May-02	1	1	1	0	0	0
2019	May-02	0	0	0	0	1	0
2019	May-02	1	0	0	0	0	0
2019	May-02	0	0	1	0	0	0
2019	May-02	0	0	0	0	0	0
2019	May-02	0	0	0	0	0	0
2019	May-02	0	0	0	0	0	0
2019	May-02	0	0	1	0	0	15
2019	May-02	1	0	0	0	0	0
2018	May-03	1	0	0	0	0	0
2018	May-03	0	0	1	0	0	0
2018	May-03	0	0	0	0	0	0
2018	May-03	0	0	0	0	0	0
2018	May-03	1	0	0	0	0	0
2018	May-03	0	0	0	0	0	1
2018	May-03	0	0	1	0	0	0
2018	May-03	0	0	1	0	0	0
2018	May-03	0	0	1	0	0	0
2018	May-03	0	0	1	0	0	0
2018	May-03	0	0	1	0	0	0
2018	May-03	0	0	1	0	0	0
2018	May-03	1	0	0	0	0	0
2018	May-03	1	0	0	0	0	0
2018	May-03	0	0	1	0	0	0
2018	May-03	0	0	1	0	0	0
2018	May-03	0	0	0	1	0	0
2018	May-03	0	0	0	1	0	0
2018	May-03	0	0	0	0	1	0
2018	May-03	0	0	1	0	0	0
2019	May-03	1	0	0	0	0	0
2019	May-03	1	0	0	0	0	0
2019	May-03	1	0	0	0	0	0
2019	May-03	1	0	1	0	0	0
2019	May-03	1	0	0	0	0	0
2019	May-03	1	0	0	0	0	0
2019	May-03	0	0	0	0	0	1
2019	May-03	1	1	1	0	0	0
2019	May-03	1	1	1	0	0	0
2019	May-03	1	1	1	0	0	0
2019	May-03	1	1	1	0	0	0
2019	May-03	0	0	0	0	1	0
2019	May-03	1	0	0	0	0	0
2019	May-03	0	0	1	0	0	0
2019	May-03	0	0	0	0	0	0
2019	May-03	0	0	0	0	0	0
2019	May-03	0	0	0	0	0	0
2019	May-03	0	0	1	0	0	15
2019	May-03	1	0	0	0	0	0
2018	2004-05-01	1	0	0	0	0	0
2018	2004-05-01	0	0	1	0	0	0
2018	2004-05-01	0	0	0	0	0	0
2018	2004-05-01	0	0	0	0	0	0
2018	2004-05-01	1	0	0	0	0	0
2018	2004-05-01	0	0	0	0	0	1
2018	2004-05-01	0	0	1	0	0	0
2018	2004-05-01	0	0	1	0	0	0
2018	2004-05-01	0	0	1	0	0	0
2018	2004-05-01	0	0	1	0	0	0
2018	2004-05-01	0	0	1	0	0	0
2018	2004-05-01	0	0	1	0	0	0
2018	2004-05-01	1	0	0	0	0	0
2018	2004-05-01	1	0	0	0	0	0
2018	2004-05-01	0	0	1	0	0	0
2018	2004-05-01	0	0	1	0	0	0
2018	2004-05-01	0	0	0	1	0	0
2018	2004-05-01	0	0	0	1	0	0
2018	2004-05-01	0	0	0	0	1	0
2018	2004-05-01	0	0	1	0	0	0
2019	2004-05-01	1	0	0	0	0	0
2019	2004-05-01	1	0	0	0	0	0
2019	2004-05-01	1	0	0	0	0	0
2019	2004-05-01	1	0	1	0	0	0
2019	2004-05-01	1	0	0	0	0	0
2019	2004-05-01	1	0	0	0	0	0
2019	2004-05-01	0	0	0	0	0	1
2019	2004-05-01	1	1	1	0	0	0
2019	2004-05-01	1	1	1	0	0	0
2019	2004-05-01	1	1	1	0	0	0
2019	2004-05-01	1	1	1	0	0	0
2019	2004-05-01	0	0	0	0	1	0
2019	2004-05-01	1	0	0	0	0	0
2019	2004-05-01	0	0	1	0	0	0
2019	2004-05-01	0	0	0	0	0	0
2019	2004-05-01	0	0	0	0	0	0
2019	2004-05-01	0	0	0	0	0	0
2019	2004-05-01	0	0	1	0	0	15
2019	2004-05-01	1	0	0	0	0	0
2018	June-01	1	0	0	0	0	0
2018	June-01	0	0	1	0	0	0
2018	June-01	0	0	0	0	0	0
2018	June-01	0	0	0	0	0	0
2018	June-01	1	0	0	0	0	0
2018	June-01	0	0	0	0	0	1
2018	June-01	0	0	1	0	0	0
2018	June-01	0	0	1	0	0	0
2018	June-01	0	0	1	0	0	0
2018	June-01	0	0	1	0	0	0
2018	June-01	0	0	1	0	0	0
2018	June-01	0	0	1	0	0	0
2018	June-01	1	0	0	0	0	0
2018	June-01	1	0	0	0	0	0
2018	June-01	0	0	1	0	0	0
2018	June-01	0	0	1	0	0	0
2018	June-01	0	0	0	1	0	0
2018	June-01	0	0	0	1	0	0
2018	June-01	0	0	0	0	1	0
2018	June-01	0	0	1	0	0	0
2019	June-01	1	0	0	0	0	0
2019	June-01	1	0	0	0	0	0
2019	June-01	1	0	0	0	0	0
2019	June-01	1	0	1	0	0	0
2019	June-01	1	0	0	0	0	0
2019	June-01	1	0	0	0	0	0
2019	June-01	0	0	0	0	0	1
2019	June-01	1	1	1	0	0	0
2019	June-01	1	1	1	0	0	0
2019	June-01	1	1	1	0	0	0
2019	June-01	1	1	1	0	0	0
2019	June-01	0	0	0	0	1	0
2019	June-01	1	0	0	0	0	0
2019	June-01	0	0	1	0	0	0
2019	June-01	0	0	0	0	0	0
2019	June-01	0	0	0	0	0	0
2019	June-01	0	0	0	0	0	0
2019	June-01	0	0	1	0	0	15
2018	June-02	1	0	0	0	0	0
2018	June-02	1	0	0	0	0	0
2018	June-02	0	0	1	0	0	0
2018	June-02	0	0	0	0	0	0
2018	June-02	0	0	0	0	0	0
2018	June-02	1	0	0	0	0	0
2018	June-02	0	0	0	0	0	1
2018	June-02	Cereal	Olive	1	0	0	0
2018	June-02	0	0	1	0	0	0
2018	June-02	0	0	1	0	0	0
2018	June-02	0	0	1	0	0	0
2018	June-02	0	0	1	0	0	0
2018	June-02	0	0	1	0	0	0
2018	June-02	1	0	0	0	0	0
2018	June-02	1	0	0	0	0	0
2018	June-02	0	0	1	0	0	0
2018	June-02	0	0	1	0	0	0
2018	June-02	0	0	0	1	0	0
2018	June-02	0	0	0	1	0	0
2018	June-02	0	0	0	0	1	0
2019	June-02	0	0	1	0	0	0
2019	June-02	1	0	0	0	0	0
2019	June-02	1	0	0	0	0	0
2019	June-02	1	0	0	0	0	0
2019	June-02	1	0	1	0	0	0
2019	June-02	1	0	0	0	0	0
2019	June-02	1	0	0	0	0	0
2019	June-02	0	0	0	0	0	1
2019	June-02	1	1	1	0	0	0
2019	June-02	1	1	1	0	0	0
2019	June-02	1	1	1	0	0	0
2019	June-02	1	1	1	0	0	0
2019	June-02	0	0	0	0	1	0
2019	June-02	1	0	0	0	0	0
2019	June-02	0	0	1	0	0	0
2019	June-02	0	0	0	0	0	0
2019	June-02	0	0	0	0	0	0
2019	June-02	0	0	0	0	0	0
2018	June-03	0	0	1	0	0	15
2018	June-03	1	0	0	0	0	0
2018	June-03	1	0	0	0	0	0
2018	June-03	0	0	1	0	0	0
2018	June-03	0	0	0	0	0	0
2018	June-03	0	0	0	0	0	0
2018	June-03	1	0	0	0	0	0
2018	June-03	0	0	0	0	0	1
2018	June-03	0	0	1	0	0	0
2018	June-03	0	0	1	0	0	0
2018	June-03	0	0	1	0	0	0
2018	June-03	0	0	1	0	0	0
2018	June-03	0	0	1	0	0	0
2018	June-03	0	0	1	0	0	0
2018	June-03	1	0	0	0	0	0
2018	June-03	1	0	0	0	0	0
2018	June-03	0	0	1	0	0	0
2018	June-03	0	0	1	0	0	0
2018	June-03	0	0	0	1	0	0
2018	June-03	0	0	0	1	0	0
2019	June-03	0	0	0	0	1	0
2019	June-03	0	0	1	0	0	0
2019	June-03	1	0	0	0	0	0
2019	June-03	1	0	0	0	0	0
2019	June-03	1	0	0	0	0	0
2019	June-03	1	0	1	0	0	0
2019	June-03	1	0	0	0	0	0
2019	June-03	1	0	0	0	0	0
2019	June-03	0	0	0	0	0	1
2019	June-03	1	1	1	0	0	0
2019	June-03	1	1	1	0	0	0
2019	June-03	1	1	1	0	0	0
2019	June-03	1	1	1	0	0	0
2019	June-03	0	0	0	0	1	0
2019	June-03	1	0	0	0	0	0
2019	June-03	0	0	1	0	0	0
2019	June-03	0	0	0	0	0	0
2019	June-03	0	0	0	0	0	0
2018	2004-06-01	0	0	0	0	0	0
2018	2004-06-01	0	0	1	0	0	15
2018	2004-06-01	1	0	0	0	0	0
2018	2004-06-01	1	0	0	0	0	0
2018	2004-06-01	0	0	1	0	0	0
2018	2004-06-01	0	0	0	0	0	0
2018	2004-06-01	0	0	0	0	0	0
2018	2004-06-01	1	0	0	0	0	0
2018	2004-06-01	0	0	0	0	0	1
2018	2004-06-01	0	0	1	0	0	0
2018	2004-06-01	0	0	1	0	0	0
2018	2004-06-01	0	0	1	0	0	0
2018	2004-06-01	0	0	1	0	0	0
2018	2004-06-01	0	0	1	0	0	0
2018	2004-06-01	0	0	1	0	0	0
2018	2004-06-01	1	0	0	0	0	0
2018	2004-06-01	1	0	0	0	0	0
2018	2004-06-01	0	0	1	0	0	0
2018	2004-06-01	0	0	1	0	0	0
2018	2004-06-01	0	0	0	1	0	0
2019	2004-06-01	0	0	0	1	0	0
2019	2004-06-01	0	0	0	0	1	0
2019	2004-06-01	0	0	1	0	0	0
2019	2004-06-01	1	0	0	0	0	0
2019	2004-06-01	1	0	0	0	0	0
2019	2004-06-01	1	0	0	0	0	0
2019	2004-06-01	1	0	1	0	0	0
2019	2004-06-01	1	0	0	0	0	0
2019	2004-06-01	1	0	0	0	0	0
2019	2004-06-01	0	0	0	0	0	1
2019	2004-06-01	1	1	1	0	0	0
2019	2004-06-01	1	1	1	0	0	0
2019	2004-06-01	1	1	1	0	0	0
2019	2004-06-01	1	1	1	0	0	0
2019	2004-06-01	0	0	0	0	1	0
2019	2004-06-01	1	0	0	0	0	0
2019	2004-06-01	0	0	1	0	0	0
2019	2004-06-01	0	0	0	0	0	0
2018	July-01	0	0	0	0	0	0
2018	July-01	0	0	0	0	0	0
2018	July-01	0	0	1	0	0	15
2018	July-01	1	0	0	0	0	0
2018	July-01	1	0	0	0	0	0
2018	July-01	0	0	1	0	0	0
2018	July-01	0	0	0	0	0	0
2018	July-01	0	0	0	0	0	0
2018	July-01	1	0	0	0	0	0
2018	July-01	0	0	0	0	0	1
2018	July-01	0	0	1	0	0	0
2018	July-01	0	0	1	0	0	0
2018	July-01	0	0	1	0	0	0
2018	July-01	0	0	1	0	0	0
2018	July-01	0	0	1	0	0	0
2018	July-01	0	0	1	0	0	0
2018	July-01	1	0	0	0	0	0
2018	July-01	1	0	0	0	0	0
2018	July-01	0	0	1	0	0	0
2018	July-01	0	0	1	0	0	0
2019	July-01	0	0	0	1	0	0
2019	July-01	0	0	0	1	0	0
2019	July-01	0	0	0	0	1	0
2019	July-01	0	0	1	0	0	0
2019	July-01	1	0	0	0	0	0
2019	July-01	1	0	0	0	0	0
2019	July-01	1	0	0	0	0	0
2019	July-01	1	0	1	0	0	0
2019	July-01	1	0	0	0	0	0
2019	July-01	1	0	0	0	0	0
2019	July-01	0	0	0	0	0	1
2019	July-01	1	1	1	0	0	0
2019	July-01	1	1	1	0	0	0
2019	July-01	1	1	1	0	0	0
2019	July-01	1	1	1	0	0	0
2019	July-01	0	0	0	0	1	0
2019	July-01	1	0	0	0	0	0
2019	July-01	0	0	1	0	0	0
2018	July-02	0	0	0	0	0	0
2018	July-02	0	0	0	0	0	0
2018	July-02	0	0	0	0	0	0
2018	July-02	0	0	1	0	0	15
2018	July-02	1	0	0	0	0	0
2018	July-02	1	0	0	0	0	0
2018	July-02	0	0	1	0	0	0
2018	July-02	0	0	0	0	0	0
2018	July-02	0	0	0	0	0	0
2018	July-02	1	0	0	0	0	0
2018	July-02	0	0	0	0	0	1
2018	July-02	0	0	1	0	0	0
2018	July-02	0	0	1	0	0	0
2018	July-02	0	0	1	0	0	0
2018	July-02	0	0	1	0	0	0
2018	July-02	0	0	1	0	0	0
2018	July-02	0	0	1	0	0	0
2018	July-02	1	0	0	0	0	0
2018	July-02	1	0	0	0	0	0
2018	July-02	0	0	1	0	0	0
2019	July-02	0	0	1	0	0	0
2019	July-02	0	0	0	1	0	0
2019	July-02	0	0	0	1	0	0
2019	July-02	0	0	0	0	1	0
2019	July-02	0	0	1	0	0	0
2019	July-02	1	0	0	0	0	0
2019	July-02	1	0	0	0	0	0
2019	July-02	1	0	0	0	0	0
2019	July-02	1	0	1	0	0	0
2019	July-02	1	0	0	0	0	0
2019	July-02	1	0	0	0	0	0
2019	July-02	0	0	0	0	0	1
2019	July-02	1	1	1	0	0	0
2019	July-02	1	1	1	0	0	0
2019	July-02	1	1	1	0	0	0
2019	July-02	1	1	1	0	0	0
2019	July-02	0	0	0	0	1	0
2019	July-02	1	0	0	0	0	0
2018	July-03	0	0	1	0	0	0
2018	July-03	0	0	0	0	0	0
2018	July-03	0	0	0	0	0	0
2018	July-03	0	0	0	0	0	0
2018	July-03	0	0	1	0	0	15
2018	July-03	1	0	0	0	0	0
2018	July-03	1	0	0	0	0	0
2018	July-03	0	0	1	0	0	0
2018	July-03	0	0	0	0	0	0
2018	July-03	0	0	0	0	0	0
2018	July-03	1	0	0	0	0	0
2018	July-03	0	0	0	0	0	1
2018	July-03	0	0	1	0	0	0
2018	July-03	0	0	1	0	0	0
2018	July-03	0	0	1	0	0	0
2018	July-03	0	0	1	0	0	0
2018	July-03	0	0	1	0	0	0
2018	July-03	0	0	1	0	0	0
2018	July-03	1	0	0	0	0	0
2018	July-03	1	0	0	0	0	0
2019	July-03	0	0	1	0	0	0
2019	July-03	0	0	1	0	0	0
2019	July-03	0	0	0	1	0	0
2019	July-03	0	0	0	1	0	0
2019	July-03	0	0	0	0	1	0
2019	July-03	0	0	1	0	0	0
2019	July-03	1	0	0	0	0	0
2019	July-03	1	0	0	0	0	0
2019	July-03	1	0	0	0	0	0
2019	July-03	1	0	1	0	0	0
2019	July-03	1	0	0	0	0	0
2019	July-03	1	0	0	0	0	0
2019	July-03	0	0	0	0	0	1
2019	July-03	1	1	1	0	0	0
2019	July-03	1	1	1	0	0	0
2019	July-03	1	1	1	0	0	0
2019	July-03	1	1	1	0	0	0
2019	July-03	0	0	0	0	1	0
2018	2004-07-01	1	0	0	0	0	0
2018	2004-07-01	0	0	1	0	0	0
2018	2004-07-01	0	0	0	0	0	0
2018	2004-07-01	0	0	0	0	0	0
2018	2004-07-01	0	0	0	0	0	0
2018	2004-07-01	0	0	1	0	0	15
2018	2004-07-01	1	0	0	0	0	0
2019	2004-07-01	1	0	0	0	0	0
2019	2004-07-01	0	0	1	0	0	0
2019	2004-07-01	0	0	0	0	0	0
2019	2004-07-01	0	0	0	0	0	0
2019	2004-07-01	1	0	0	0	0	0
2019	2004-07-01	0	0	0	0	0	1

## Sheet: Habitat use (weeks)
		Cumulative
			Weeks	Cereal plots	Olive groves	Cereals-Olives	Urban habitat	Cereals-Olives-Urban	Aquatic habitats	Weeaks
				CP	OG	CO	UH	COU	AH
			2001-03-01	22	14	7	1	6	87	1
			2002-03-01	42	17	13	2	8	102	2
			2003-03-01	71	33	33	3	9	66	3
			2004-03-01	66	34	23	6	11	76	4
			2001-04-01	58	28	26	5	12	41	5
			2002-04-01	17	88	12	6	16	53	6
			2003-04-01	24	68	22	7	7	32	7
			2004-04-01	32	55	19	4	8	11	8
			May-01	55	87	15	6	7	16	9
			May-02	33	69	12	7	8	12	10
			May-03	36	68	11	6	9	17	11
			2004-05-01	43	67	6	4	11	44	12
			June-01	23	61	28	5	7	12	13
			June-02	26	86	38	8	8	13	14
			June-03	21	77	26	7	8	16	15
			June-04	26	58	21	7	10	14	16
			July-01	34	58	27	7	8	48	17
			July-02	79	55	26	5	7	56	18
			July-03	78	65	27	7	6	69	19
			2004-07-01	77	47	29	3	6	98	20
				863	1135	421	106	172	883

## Sheet: Habitat use (factors)
		Distances estimated in Qgis
		Observed birds	Factors
		Occurrence of Turtle doves	Distance to roads	Distance to buildings	Predators (observed with occurrence of doves)	Competitors (Other columbidae using the same resources)	Distance to nearest water sources	Distance to nearest cereal plot
		TD	DR	DB	Pr	CP	DW	DC
		0	1	20	0	0	0	0
		0	1	320	0	0	0	0
		0	1	500	0	0	0	0
		0	1	140	0	0	0	0
		1	1	58	0	0	0	0
		1	1	35	0	0	0	0
		0	1	15	0	0	0	0
		2	1	340	0	0	0	0
		0	1	23	0	0	0	0
		0	1	1	0	3	0	0
		0	1	1	0	1	0	0
		1	1	12	0	2	0	0
		0	1	50	0	0	0	0
		4	1	1	0	0	0	0
		18	18	40	0	0	0	0
		16	17	89	0	0	0	0
		3	1	340	0	0	0	0
		0	1	370	1	0	0	0
		14	1	39	0	0	500	0
		20	700	350	1	0	1	0
		12	22	400	0	0	450	13
		8	14	200	0	0	240	6
		18	0	120	0	3	20	4
		6	430	120	1	0	140	6
		4	250	160	0	0	140	18
		8	100	90	0	0	240	4
		3	14	44	0	0	400	50
		0	0	0	0	0	0	0
		0	0	0	0	0	0	0
		0	0	0	0	0	0	0
		9	29	160	0	0	25	47
		9	0	0	0	0	300	12
		0	0	0	0	0	600	12
		16	22	450	0	0	1000	6
		22	0	0	1	6	1000	57
		22	0	0	0	0	450	0
		22	0	0	0	0	350	0
		22	0	0	0	0	20	0
		0	0	21	0	0	0	0
		0	1	20	0	0	0	0
		0	1	320	0	0	0	0
		0	1	500	0	0	0	0
		0	1	140	0	0	0	0
		1	1	58	0	0	0	0
		1	1	35	0	0	0	0
		0	1	15	0	0	0	0
		2	1	340	0	0	0	0
		0	1	23	0	0	0	0
		0	1	1	0	3	0	0
		0	1	1	0	1	0	0
		1	1	12	0	2	0	0
		0	1	50	0	0	0	0
		4	1	1	0	0	0	0
		18	18	40	0	0	0	0
		16	17	89	0	0	0	0
		3	1	340	0	0	0	0
		0	1	370	1	0	0	0
		14	1	39	0	0	500	0
		20	700	350	1	0	1	0
		12	22	400	0	0	450	13
		8	14	200	0	0	240	6
		18	0	120	0	3	20	4
		6	430	120	1	0	140	6
		4	250	160	0	0	140	18
		8	100	90	0	0	240	4
		3	14	44	0	0	400	50
		0	0	0	0	0	0	0
		0	0	0	0	0	0	0
		0	0	0	0	0	0	0
		9	29	160	0	0	25	47
		9	0	0	0	0	300	12
		0	0	0	0	0	600	12
		16	22	450	0	0	1000	6
		22	0	0	1	6	1000	57
		22	0	0	0	0	450	0
		22	0	0	0	0	350	0
		22	0	0	0	0	20	0
		0	1	18	0	0	0	0
		0	1	20	0	0	0	0
		0	1	320	0	0	0	0
		0	1	500	0	0	0	0
		0	1	140	0	0	0	0
		1	1	58	0	0	0	0
		1	1	35	0	0	0	0
		0	1	15	0	0	0	0
		2	1	340	0	0	0	0
		0	1	23	0	0	0	0
		0	1	1	0	3	0	0
		0	1	1	0	1	0	0
		1	1	12	0	2	0	0
		0	1	50	0	0	0	0
		4	1	1	0	0	0	0
		18	18	40	0	0	0	0
		16	17	89	0	0	0	0
		3	1	340	0	0	0	0
		0	1	370	1	0	0	0
		14	1	39	0	0	500	0
		20	700	350	1	0	1	0
		12	22	400	0	0	450	13
		8	14	200	0	0	240	6
		18	0	120	0	3	20	4
		6	430	120	1	0	140	6
		4	250	160	0	0	140	18
		8	100	90	0	0	240	4
		3	14	44	0	0	400	50
		0	0	0	0	0	0	0
		0	0	0	0	0	0	0
		0	0	0	0	0	0	0
		9	29	160	0	0	25	47
		9	0	0	0	0	300	12
		0	0	0	0	0	600	12
		16	22	450	0	0	1000	6
		22	0	0	1	6	1000	57
		22	0	0	0	0	450	0
		22	0	0	0	0	350	0
		22	0	0	0	0	20	0
		0	1	25	0	0	0	0
		0	1	20	0	0	0	0
		0	1	320	0	0	0	0
		0	1	500	0	0	0	0
		0	1	140	0	0	0	0
		1	1	58	0	0	0	0
		1	1	35	0	0	0	0
		0	1	15	0	0	0	0
		2	1	340	0	0	0	0
		0	1	23	0	0	0	0
		0	1	1	0	3	0	0
		0	1	1	0	1	0	0
		1	1	12	0	2	0	0
		0	1	50	0	0	0	0
		4	1	1	0	0	0	0
		18	18	40	0	0	0	0
		16	17	89	0	0	0	0
		3	1	340	0	0	0	0
		0	1	370	1	0	0	0
		14	1	39	0	0	500	0
		20	700	350	1	0	1	0
		12	22	400	0	0	450	13
		8	14	200	0	0	240	6
		18	0	120	0	3	20	4
		6	430	120	1	0	140	6
		4	250	160	0	0	140	18
		8	100	90	0	0	240	4
		3	14	44	0	0	400	50
		0	0	0	0	0	0	0
		0	0	0	0	0	0	0
		0	0	0	0	0	0	0
		9	29	160	0	0	25	47
		9	0	0	0	0	300	12
		0	0	0	0	0	600	12
		16	22	450	0	0	1000	6
		22	0	0	1	6	1000	57
		22	0	0	0	0	450	0
		22	0	0	0	0	350	0
		22	0	0	0	0	20	0
		0	1	24	0	0	0	0
		0	1	20	0	0	0	0
		0	1	320	0	0	0	0
		0	1	500	0	0	0	0
		0	1	140	0	0	0	0
		1	1	58	0	0	0	0
		1	1	35	0	0	0	0
		0	1	15	0	0	0	0
		2	1	340	0	0	0	0
		0	1	23	0	0	0	0
		0	1	1	0	3	0	0
		0	1	1	0	1	0	0
		1	1	12	0	2	0	0
		0	1	50	0	0	0	0
		4	1	1	0	0	0	0
		18	18	40	0	0	0	0
		16	17	89	0	0	0	0
		3	1	340	0	0	0	0
		0	1	370	1	0	0	0
		14	1	39	0	0	500	0
		20	700	350	1	0	1	0
		12	22	400	0	0	450	13
		8	14	200	0	0	240	6
		18	0	120	0	3	20	4
		6	430	120	1	0	140	6
		4	250	160	0	0	140	18
		8	100	90	0	0	240	4
		3	14	44	0	0	400	50
		0	0	0	0	0	0	0
		0	0	0	0	0	0	0
		0	0	0	0	0	0	0
		9	29	160	0	0	25	47
		9	0	0	0	0	300	12
		0	0	0	0	0	600	12
		16	22	450	0	0	1000	6
		22	0	0	1	6	1000	57
		22	0	0	0	0	450	0
		22	0	0	0	0	350	0
		22	0	0	0	0	20	0
		0	1	19	0	0	0	0
		0	1	20	0	0	0	0
		0	1	320	0	0	0	0
		0	1	500	0	0	0	0
		0	1	140	0	0	0	0
		1	1	58	0	0	0	0
		1	1	35	0	0	0	0
		0	1	15	0	0	0	0
		2	1	340	0	0	0	0
		0	1	23	0	0	0	0
		0	1	1	0	3	0	0
		0	1	1	0	1	0	0
		1	1	12	0	2	0	0
		0	1	50	0	0	0	0
		4	1	1	0	0	0	0
		18	18	40	0	0	0	0
		16	17	89	0	0	0	0
		3	1	340	0	0	0	0
		0	1	370	1	0	0	0
		14	1	39	0	0	500	0
		20	700	350	1	0	1	0
		12	22	400	0	0	450	13
		8	14	200	0	0	240	6
		18	0	120	0	3	20	4
		6	430	120	1	0	140	6
		4	250	160	0	0	140	18
		8	100	90	0	0	240	4
		3	14	44	0	0	400	50
		0	0	0	0	0	0	0
		0	0	0	0	0	0	0
		0	0	0	0	0	0	0
		9	29	160	0	0	25	47
		9	0	0	0	0	300	12
		0	0	0	0	0	600	12
		16	22	450	0	0	1000	6
		22	0	0	1	6	1000	57
		22	0	0	0	0	450	0
		22	0	0	0	0	350	0
		22	0	0	0	0	20	0
		0	1	23	0	0	0	0
		0	1	20	0	0	0	0
		0	1	320	0	0	0	0
		0	1	500	0	0	0	0
		0	1	140	0	0	0	0
		1	1	58	0	0	0	0
		1	1	35	0	0	0	0
		0	1	15	0	0	0	0
		2	1	340	0	0	0	0
		0	1	23	0	0	0	0
		0	1	1	0	3	0	0
		0	1	1	0	1	0	0
		1	1	12	0	2	0	0
		0	1	50	0	0	0	0
		4	1	1	0	0	0	0
		18	18	40	0	0	0	0
		16	17	89	0	0	0	0
		3	1	340	0	0	0	0
		0	1	370	1	0	0	0
		14	1	39	0	0	500	0
		20	700	350	1	0	1	0
		12	22	400	0	0	450	13
		8	14	200	0	0	240	6
		18	0	120	0	3	20	4
		6	430	120	1	0	140	6
		4	250	160	0	0	140	18
		8	100	90	0	0	240	4
		3	14	44	0	0	400	50
		0	0	0	0	0	0	0
		0	0	0	0	0	0	0
		0	0	0	0	0	0	0
		9	29	160	0	0	25	47
		9	0	0	0	0	300	12
		0	0	0	0	0	600	12
		16	22	450	0	0	1000	6
		22	0	0	1	6	1000	57
		22	0	0	0	0	450	0
		22	0	0	0	0	350	0
		22	0	0	0	0	20	0
		0	1	21	0	0	0	0
		0	1	20	0	0	0	0
		0	1	320	0	0	0	0
		0	1	500	0	0	0	0
		0	1	140	0	0	0	0
		1	1	58	0	0	0	0
		1	1	35	0	0	0	0
		0	1	15	0	0	0	0
		2	1	340	0	0	0	0
		0	1	23	0	0	0	0
		0	1	1	0	3	0	0
		0	1	1	0	1	0	0
		1	1	12	0	2	0	0
		0	1	50	0	0	0	0
		4	1	1	0	0	0	0
		18	18	40	0	0	0	0
		16	17	89	0	0	0	0
		3	1	340	0	0	0	0
		0	1	370	1	0	0	0
		14	1	39	0	0	500	0
		20	700	350	1	0	1	0
		12	22	400	0	0	450	13
		8	14	200	0	0	240	6
		18	0	120	0	3	20	4
		6	430	120	1	0	140	6
		4	250	160	0	0	140	18
		8	100	90	0	0	240	4
		3	14	44	0	0	400	50
		0	0	0	0	0	0	0
		0	0	0	0	0	0	0
		0	0	0	0	0	0	0
		9	29	160	0	0	25	47
		9	0	0	0	0	300	12
		0	0	0	0	0	600	12
		16	22	450	0	0	1000	6
		22	0	0	1	6	1000	57
		22	0	0	0	0	450	0
		22	0	0	0	0	350	0
		22	0	0	0	0	20	0
		0	1	21	0	0	0	0
		0	1	20	0	0	0	0
		0	1	320	0	0	0	0
		0	1	500	0	0	0	0
		0	1	140	0	0	0	0
		1	1	58	0	0	0	0
		1	1	35	0	0	0	0
		0	1	15	0	0	0	0
		2	1	340	0	0	0	0
		0	1	23	0	0	0	0
		0	1	1	0	3	0	0
		0	1	1	0	1	0	0
		1	1	12	0	2	0	0
		0	1	50	0	0	0	0
		4	1	1	0	0	0	0
		18	18	40	0	0	0	0
		16	17	89	0	0	0	0
		3	1	340	0	0	0	0
		0	1	370	1	0	0	0
		14	1	39	0	0	500	0
		20	700	350	1	0	1	0
		12	22	400	0	0	450	13
		8	14	200	0	0	240	6
		18	0	120	0	3	20	4
		6	430	120	1	0	140	6
		4	250	160	0	0	140	18
		8	100	90	0	0	240	4
		3	14	44	0	0	400	50
		0	0	0	0	0	0	0
		0	0	0	0	0	0	0
		0	0	0	0	0	0	0
		9	29	160	0	0	25	47
		9	0	0	0	0	300	12
		0	0	0	0	0	600	12
		16	22	450	0	0	1000	6
		22	0	0	1	6	1000	57
		22	0	0	0	0	450	0
		22	0	0	0	0	350	0
		22	0	0	0	0	20	0
		0	1	21	0	0	0	0
		0	1	20	0	0	0	0
		0	1	320	0	0	0	0
		0	1	500	0	0	0	0
		0	1	140	0	0	0	0
		1	1	58	0	0	0	0
		1	1	35	0	0	0	0
		0	1	15	0	0	0	0
		2	1	340	0	0	0	0
		0	1	23	0	0	0	0
		0	1	1	0	3	0	0
		0	1	1	0	1	0	0
		1	1	12	0	2	0	0
		0	1	50	0	0	0	0
		4	1	1	0	0	0	0
		18	18	40	0	0	0	0
		16	17	89	0	0	0	0
		3	1	340	0	0	0	0
		0	1	370	1	0	0	0
		14	1	39	0	0	500	0
		20	700	350	1	0	1	0
		12	22	400	0	0	450	13
		8	14	200	0	0	240	6
		18	0	120	0	3	20	4
		6	430	120	1	0	140	6
		4	250	160	0	0	140	18
		8	100	90	0	0	240	4
		3	14	44	0	0	400	50
		0	0	0	0	0	0	0
		0	0	0	0	0	0	0
		0	0	0	0	0	0	0
		9	29	160	0	0	25	47
		9	0	0	0	0	300	12
		0	0	0	0	0	600	12
		16	22	450	0	0	1000	6
		22	0	0	1	6	1000	57
		22	0	0	0	0	450	0
		22	0	0	0	0	350	0
		22	0	0	0	0	20	0
		0	1	20	0	0	0	0
		0	1	20	0	0	0	0
		0	1	320	0	0	0	0
		0	1	500	0	0	0	0
		0	1	140	0	0	0	0
		1	1	58	0	0	0	0
		1	1	35	0	0	0	0
		0	1	15	0	0	0	0
		2	1	340	0	0	0	0
		0	1	23	0	0	0	0
		0	1	1	0	3	0	0
		0	1	1	0	1	0	0
		1	1	12	0	2	0	0
		0	1	50	0	0	0	0
		4	1	1	0	0	0	0
		18	18	40	0	0	0	0
		16	17	89	0	0	0	0
		3	1	340	0	0	0	0
		0	1	370	1	0	0	0
		14	1	39	0	0	500	0
		20	700	350	1	0	1	0
		12	22	400	0	0	450	13
		8	14	200	0	0	240	6
		18	0	120	0	3	20	4
		6	430	120	1	0	140	6
		4	250	160	0	0	140	18
		8	100	90	0	0	240	4
		3	14	44	0	0	400	50
		0	0	0	0	0	0	0
		0	0	0	0	0	0	0
		0	0	0	0	0	0	0
		9	29	160	0	0	25	47
		9	0	0	0	0	300	12
		0	0	0	0	0	600	12
		16	22	450	0	0	1000	6
		22	0	0	1	6	1000	57
		22	0	0	0	0	450	0
		22	0	0	0	0	350	0
		22	0	0	0	0	20	0
		0	1	20	0	0	0	0
		0	1	20	0	0	0	0
		0	1	320	0	0	0	0
		0	1	500	0	0	0	0
		0	1	140	0	0	0	0
		1	1	58	0	0	0	0
		1	1	35	0	0	0	0
		0	1	15	0	0	0	0
		2	1	340	0	0	0	0
		0	1	23	0	0	0	0
		0	1	1	0	3	0	0
		0	1	1	0	1	0	0
		1	1	12	0	2	0	0
		0	1	50	0	0	0	0
		4	1	1	0	0	0	0
		18	18	40	0	0	0	0
		16	17	89	0	0	0	0
		3	1	340	0	0	0	0
		0	1	370	1	0	0	0
		14	1	39	0	0	500	0
		20	700	350	1	0	1	0
		12	22	400	0	0	450	13
		8	14	200	0	0	240	6
		18	0	120	0	3	20	4
		6	430	120	1	0	140	6
		4	250	160	0	0	140	18
		8	100	90	0	0	240	4
		3	14	44	0	0	400	50
		0	0	0	0	0	0	0
		0	0	0	0	0	0	0
		0	0	0	0	0	0	0
		9	29	160	0	0	25	47
		9	0	0	0	0	300	12
		0	0	0	0	0	600	12
		16	22	450	0	0	1000	6
		22	0	0	1	6	1000	57
		22	0	0	0	0	450	0
		22	0	0	0	0	350	0
		22	0	0	0	0	20	0
		0	1	20	0	0	0	0
		0	1	20	0	0	0	0
		0	1	320	0	0	0	0
		0	1	500	0	0	0	0
		0	1	140	0	0	0	0
		1	1	58	0	0	0	0
		1	1	35	0	0	0	0
		0	1	15	0	0	0	0
		2	1	340	0	0	0	0
		0	1	23	0	0	0	0
		0	1	1	0	3	0	0
		0	1	1	0	1	0	0
		1	1	12	0	2	0	0
		0	1	50	0	0	0	0
		4	1	1	0	0	0	0
		18	18	40	0	0	0	0
		16	17	89	0	0	0	0
		3	1	340	0	0	0	0
		0	1	370	1	0	0	0
		14	1	39	0	0	500	0
		20	700	350	1	0	1	0
		12	22	400	0	0	450	13
		8	14	200	0	0	240	6
		18	0	120	0	3	20	4
		6	430	120	1	0	140	6
		4	250	160	0	0	140	18
		8	100	90	0	0	240	4
		3	14	44	0	0	400	50
		0	0	0	0	0	0	0
		0	0	0	0	0	0	0
		0	0	0	0	0	0	0
		9	29	160	0	0	25	47
		9	0	0	0	0	300	12
		0	0	0	0	0	600	12
		16	22	450	0	0	1000	6
		22	0	0	1	6	1000	57
		22	0	0	0	0	450	0
		22	0	0	0	0	350	0
		22	0	0	0	0	20	0
		0	1	20	0	0	0	0
		0	1	20	0	0	0	0
		0	1	320	0	0	0	0
		0	1	500	0	0	0	0
		0	1	140	0	0	0	0
		1	1	58	0	0	0	0
		1	1	35	0	0	0	0
		0	1	15	0	0	0	0
		2	1	340	0	0	0	0
		0	1	23	0	0	0	0
		0	1	1	0	3	0	0
		0	1	1	0	1	0	0
		1	1	12	0	2	0	0
		0	1	50	0	0	0	0
		4	1	1	0	0	0	0
		18	18	40	0	0	0	0
		16	17	89	0	0	0	0
		3	1	340	0	0	0	0
		0	1	370	1	0	0	0
		14	1	39	0	0	500	0
		20	700	350	1	0	1	0
		12	22	400	0	0	450	13
		8	14	200	0	0	240	6
		18	0	120	0	3	20	4
		6	430	120	1	0	140	6
		4	250	160	0	0	140	18
		8	100	90	0	0	240	4
		3	14	44	0	0	400	50
		0	0	0	0	0	0	0
		0	0	0	0	0	0	0
		0	0	0	0	0	0	0
		9	29	160	0	0	25	47
		9	0	0	0	0	300	12
		0	0	0	0	0	600	12
		16	22	450	0	0	1000	6
		22	0	0	1	6	1000	57
		22	0	0	0	0	450	0
		22	0	0	0	0	350	0
		22	0	0	0	0	20	0
		0	1	20	0	0	0	0
		0	1	20	0	0	0	0
		0	1	320	0	0	0	0
		0	1	500	0	0	0	0
		0	1	140	0	0	0	0
		1	1	58	0	0	0	0
		1	1	35	0	0	0	0
		0	1	15	0	0	0	0
		2	1	340	0	0	0	0
		0	1	23	0	0	0	0
		0	1	1	0	3	0	0
		0	1	1	0	1	0	0
		1	1	12	0	2	0	0
		0	1	50	0	0	0	0
		4	1	1	0	0	0	0
		18	18	40	0	0	0	0
		16	17	89	0	0	0	0
		3	1	340	0	0	0	0
		0	1	370	1	0	0	0
		14	1	39	0	0	500	0
		20	700	350	1	0	1	0
		12	22	400	0	0	450	13
		8	14	200	0	0	240	6
		18	0	120	0	3	20	4
		6	430	120	1	0	140	6
		4	250	160	0	0	140	18
		8	100	90	0	0	240	4
		3	14	44	0	0	400	50
		2	15	41	0	0	0	0
		3	16	43	0	0	0	0
		4	17	44	0	0	0	0
		9	29	160	0	0	25	47
		9	0	0	0	0	300	12
		0	0	0	0	0	600	12
		16	22	450	0	0	1000	6
		22	0	0	1	6	1000	57
		22	0	0	0	0	450	0
		22	0	0	0	0	350	0
		22	0	0	0	0	20	0
		0	1	20	0	0	0	0
		0	1	20	0	0	0	0
		0	1	320	0	0	0	0
		0	1	500	0	0	0	0
		0	1	140	0	0	0	0
		1	1	58	0	0	0	0
		1	1	35	0	0	0	0
		0	1	15	0	0	0	0
		2	1	340	0	0	0	0
		0	1	23	0	0	0	0
		0	1	1	0	3	0	0
		0	1	1	0	1	0	0
		1	1	12	0	2	0	0
		0	1	50	0	0	0	0
		4	1	1	0	0	0	0
		18	18	40	0	0	0	0
		16	17	89	0	0	0	0
		3	1	340	0	0	0	0
		0	1	370	1	0	0	0
		14	1	39	0	0	500	0
		20	700	350	1	0	1	0
		12	22	400	0	0	450	13
		8	14	200	0	0	240	6
		18	0	120	0	3	20	4
		6	430	120	1	0	140	6
		4	250	160	0	0	140	18
		8	100	90	0	0	240	4
		3	14	44	0	0	400	50
		0	0	0	0	0	0	0
		0	0	0	0	0	0	0
		0	0	0	0	0	0	0
		9	29	160	0	0	25	47
		9	0	0	0	0	300	12
		0	0	0	0	0	600	12
		16	22	450	0	0	1000	6
		22	0	0	1	6	1000	57
		22	0	0	0	0	450	0
		22	0	0	0	0	350	0
		22	0	0	0	0	20	0
		0	1	20	0	0	0	0
		0	1	20	0	0	0	0
		0	1	320	0	0	0	0
		0	1	500	0	0	0	0
		0	1	140	0	0	0	0
		1	1	58	0	0	0	0
		1	1	35	0	0	0	0
		0	1	15	0	0	0	0
		2	1	340	0	0	0	0
		0	1	23	0	0	0	0
		0	1	1	0	3	0	0
		0	1	1	0	1	0	0
		1	1	12	0	2	0	0
		0	1	50	0	0	0	0
		4	1	1	0	0	0	0
		18	18	40	0	0	0	0
		16	17	89	0	0	0	0
		3	1	340	0	0	0	0
		0	1	370	1	0	0	0
		14	1	39	0	0	500	0
		20	700	350	1	0	1	0
		12	22	400	0	0	450	13
		8	14	200	0	0	240	6
		18	0	120	0	3	20	4
		6	430	120	1	0	140	6
		4	250	160	0	0	140	18
		8	100	90	0	0	240	4
		3	14	44	0	0	400	50
		0	0	0	0	0	0	0
		0	0	0	0	0	0	0
		0	0	0	0	0	0	0
		9	29	160	0	0	25	47
		9	0	0	0	0	300	12
		0	0	0	0	0	600	12
		16	22	450	0	0	1000	6
		22	0	0	1	6	1000	57
		22	0	0	0	0	450	0
		22	0	0	0	0	350	0
		22	0	0	0	0	20	0
		0	1	20	0	0	0	0
		0	1	20	0	0	0	0
		0	1	320	0	0	0	0
		0	1	500	0	0	0	0
		0	1	140	0	0	0	0
		1	1	58	0	0	0	0
		1	1	35	0	0	0	0
		0	1	15	0	0	0	0
		2	1	340	0	0	0	0
		0	1	23	0	0	0	0
		0	1	1	0	3	0	0
		0	1	1	0	1	0	0
		1	1	12	0	2	0	0
		0	1	50	0	0	0	0
		4	1	1	0	0	0	0
		18	18	40	0	0	0	0
		16	17	89	0	0	0	0
		3	1	340	0	0	0	0
		0	1	370	1	0	0	0
		14	1	39	0	0	500	0
		20	700	350	1	0	1	0
		12	22	400	0	0	450	13
		8	14	200	0	0	240	6
		18	0	120	0	3	20	4
		6	430	120	1	0	140	6
		4	250	160	0	0	140	18
		8	100	90	0	0	240	4
		3	14	44	0	0	400	50
		0	0	0	0	0	0	0
		0	0	0	0	0	0	0
		0	0	0	0	0	0	0
		9	29	160	0	0	25	47
		9	0	0	0	0	300	12
		0	0	0	0	0	600	12
		16	22	450	0	0	1000	6
		22	0	0	1	6	1000	57
		22	0	0	0	0	450	0
		22	0	0	0	0	350	0
		22	0	0	0	0	20	0
		0	1	20	0	0	0	0
		0	1	20	0	0	0	0
		0	1	320	0	0	0	0
		0	1	500	0	0	0	0
		0	1	140	0	0	0	0
		1	1	58	0	0	0	0
		1	1	35	0	0	0	0
		0	1	15	0	0	0	0
		2	1	340	0	0	0	0
		0	1	23	0	0	0	0
		0	1	1	0	3	0	0
		0	1	1	0	1	0	0
		1	1	12	0	2	0	0
		0	1	50	0	0	0	0
		4	1	1	0	0	0	0
		18	18	40	0	0	0	0
		16	17	89	0	0	0	0
		3	1	340	0	0	0	0
		0	1	370	1	0	0	0
		14	1	39	0	0	500	0
		20	700	350	1	0	1	0
		12	22	400	0	0	450	13
		8	14	200	0	0	240	6
		18	0	120	0	3	20	4
		6	430	120	1	0	140	6
		4	250	160	0	0	140	18
		8	100	90	0	0	240	4
		3	14	44	0	0	400	50
		0	0	0	0	0	0	0
		0	0	0	0	0	0	0
		0	0	0	0	0	0	0
		9	29	160	0	0	25	47
		9	0	0	0	0	300	12
		0	0	0	0	0	600	12
		16	22	450	0	0	1000	6
		22	0	0	1	6	1000	57
		22	0	0	0	0	450	0
		22	0	0	0	0	350	0
		22	0	0	0	0	20	0

## Sheet: Nest-niche
				Units	Cm						m
	Central	Marginal	Orchard	Season	big diameter	small diameter	depth	distance of nest to olive central trunk	distance to lower canopy	nest height above ground	nesting-tree height
					NBD	NSD	NDP	NDCT	NDLC	NHG	NTH		Orchard
	1	0	2	2018	17	14.5	3	120	175	260	5.5		Season
	1	0	2	2018	19	16	4	101	150	225	5.6		NBD
	1	0	2	2018	20	18	6.5	86	150	208	5.5		NSD
	0	1	2	2018	18.7	16	4.3	65	135	194	4.5		NDP
	1	0	2	2018	17.6	17	7	74	179	212	5		NDCT
	1	0	2	2018	18.9	18	6.5	95	160	196	4.5		NDLC
	1	0	2	2018	17.6	16	4	80	150	250	4.5		NHG
	1	0	2	2018	12	10	7	91	157	220	4		NTH
	0	1	2	2018	18.5	12	3.5	80	160	204	4.8
	1	0	2	2018	18.6	13	5	150	80	164	4.7
	1	0	2	2018	16.9	15.05	5	170	201	340	5.7
	0	1	2	2018	16	15.5	4	150	150	300	5
	1	0	2	2018	17.04	14.8	4.9	140	65	199	4.9
	0	1	2	2018	16.1	15.6	5	260	130	200	5
	0	1	2	2018	18.1	15.1	4.8	90	140	230	4.92
	1	0	2	2018	19.9	16.02	5	120	150	240	4.8
	1	0	2	2018	17.04	14.1	4.8	119	140	256	5
	1	0	2	2018	20.5	18	6	170	182	312	4.3
	1	0	2	2018	19.4	16.2	5	127	156	470	6
	1	0	2	2018	21	16	3	149	250	220	5.8
	1	0	2	2018	19.5	14	4	127	213	256	5
	1	0	2	2018	1	14.5	4.8	130	220	200	6
	1	0	2	2018	19	16	4	121	150	225	5.6
	1	0	2	2018	17.14	14.8	4.9	140	65	140	4.9
	1	0	2	2018	20.5	18	6	171	181	213	4.3
	1	0	2	2018	21.5	12	3.5	80	160	204	4.8
	1	0	2	2018	19	13	5	170	80	164	4.7
	1	1	1	2018	17.854	15.25	5	170	201	240	5.7
	1	0	1	2018	16	15.5	4	150	150	210	5
	1	0	1	2018	20	18	6.5	86	150	168	5.5
	1	0	1	2018	20	16	4.3	65	135	184	4.5
	1	0	1	2018	16.1	15.6	5	235	130	200	5
	1	0	1	2018	19.4	16.2	5	127	156	311	6
	1	0	1	2018	19.5	14	4	127	213	173	5
	1	0	1	2018	19.9	16.02	5	120	150	221	4.8
	1	0	1	2018	20.5	18	6	170	182	112	4.3
	1	0	1	2018	19.5	14	4	127	213	296	5
	1	0	1	2018	19	16	4	121	150	213	5.6
	1	0	1	2018	20	16	4.3	65	135	189	4.5
	1	0	1	2018	19	17	7	74	179	210	5
	1	0	1	2018	20	18	6.5	95	160	191	4.5
	1	0	1	2018	19	16	4	80	150	231	4.5
	1	0	1	2018	12	10	7	91	167	211	4
	1	0	1	2018	21.5	12	3.5	80	160	202	4.8
	1	0	1	2018	19	13	5	161	134	163	4.7
	1	0	1	2018	18.95	15	5	150	201	338	5.7
	1	0	1	2018	16	15.5	4	150	150	301	5
	1	0	1	2018	20	18	6.5	86	150	207	5.5
	1	0	1	2018	20	16	4.3	65	135	189	4.5
	1	0	1	2018	16.1	15.6	5	260	170	202	5
	1	0	1	2018	19.4	16.2	5	127	156	468	6
	1	0	1	2018	19.5	14	4	127	213	216	5
	1	0	1	2018	20.5	18	6	170	182	253	4.3
	1	0	1	2018	19.5	14	4	127	213	268	5
	1	0	1	2018	19	16	4	121	150	253	5.6
	0	1	2	2019	20	16	4.3	65	135	199	4.5
	1	0	2	2019	19	17	7	74	179	232	5
	1	0	2	2019	19	16	4	121	150	261	5.6
	1	0	2	2019	17.14	14.8	4.9	140	65	288	4.9
	1	0	2	2019	20.5	18	6	171	181	211	4.3
	0	1	2	2019	21.5	12	3.5	80	160	204	4.8
	1	0	2	2019	19	13	5	170	80	194	4.7
	1	0	2	2019	19.5	14	4	127	213	296	5
	1	0	2	2019	20.5	18	6	140	182	312	4.3
	1	0	2	2019	19.5	14	4	127	213	296	5
	1	0	2	2019	17.1	16	4	121	150	225	5.6
	1	0	2	2019	17	15.8	4.3	65	135	194	4.5
	0	1	2	2019	20	18	6.5	86	150	208	5.5
	0	1	2	2019	19	16	4.3	65	135	194	4.5
	1	0	2	2019	16.1	15.6	5	160	130	200	5
	1	0	2	2019	17.4	16.2	5	127	156	470	6
	0	1	2	2019	18.5	14	4	127	213	296	5
	1	0	2	2019	17.9	17.6	6	170	182	312	4.3
	1	0	2	2019	19.5	14	4	127	213	296	5
	0	0	2	2019	18.2	15.72	5	170	201	340	5.7
	1	0	2	2019	16	15.5	4	150	150	300	5
	1	0	2	2019	19	17.8	6.5	86	150	208	5.5
	1	0	2	2019	20	16	4.3	65	135	221	4.5
	1	0	2	2019	16.1	15.6	5	260	130	200	5
	1	0	2	2019	19.4	16.2	5	127	156	470	6
	1	0	2	2019	16.5	14	4	127	213	296	5
	1	0	2	2019	17.9	16.02	5	120	150	240	4.8
	1	0	2	2019	19.7	18	6	170	182	312	4.3
	1	0	2	2019	16.7	14	4	127	213	296	5
	1	0	2	2019	17.6	14	4	127	213	296	5
	1	0	2	2019	18.5	18	6	170	182	312	4.3
	1	0	2	2019	17.5	14	4	127	213	296	5
	0	0	2	2019	17.99	15.582	5	170	201	340	5.7
	1	0	2	2019	16	15.5	4	150	150	310	5
	1	0	2	2019	16.8	15.32	5	170	201	340	5.7
	0	1	1	2019	16	15.5	4	150	150	340	5
	0	1	1	2019	18.6	18	6.5	86	150	248	5.5
	0	1	1	2019	17	16	4.3	65	135	294	4.5
	1	0	1	2019	16.1	15.6	5	270	130	270	5
	0	1	1	2019	17.5	16.2	5	112	156	470	6
	1	0	1	2019	17.4	14	4	117	213	296	5
	1	0	1	2019	17.9	16.02	5	120	150	240	4.8
	0	1	1	2019	19.5	18	6	170	182	232	4.3
	0	1	1	2019	16.9	14.3	3	120	175	240	5.5
	1	0	1	2019	17.6	16	4	121	150	245	5.6
	0	1	1	2019	17.8	16	6.5	86	150	261	5.5
	1	0	1	2019	16.9	11.9	4.3	65	142	197	4.5
	1	0	1	2019	17.9	17	7	74	179	252	5
	0	1	1	2019	17.8	16	6.5	95	168	298	4.5
	1	0	1	2019	17	16	4	80	140	236	5.5
	0	1	1	2019	13	10	7	91	152	228	5
	1	0	1	2019	17.1	12	3.5	80	168	187	4.8
	1	0	1	2019	16.4	13	5	130	180	198	5.7
	1	0	1	2019	16.8	16	4	80	150	231	4.5
	0	1	1	2019	11.5	10	7	91	160	216	4
	1	0	1	2019	16.5	12	3.5	70	170	214	5.8
	1	0	1	2019	17.6	12	5	110	85	174	4.7
	1	0	1	2019	17.4	13.4	5	135	201	330	5.7
	1	0	1	2019	16	15.5	4	123	110	310	5.5
	0	1	1	2019	16.64	14.8	4.9	140	83	290	4.9
	1	0	1	2019	16.1	15.6	5	158	131	230	5.3
	1	0	1	2019	16.7	13	5	170	80	194	5.7
	1	0	1	2019	16.63	13.53	5	171	201	340	5.7
	1	0	1	2019	16	15.5	4	150	150	314	5.7
	1	0	1	2019	16.1	14.8	4.9	140	65	236	4.9
	0	1	1	2019	16.1	15.6	5	260	130	200	6
Total	97	23		Mean	17.8944	15.2441	4.87521	126.545	158.777	251.223	5.04479

## Sheet: Nesting trees
		Central	Marginal	Orchard	Season	Turtle dove	Supporting Trees
		1	0	2	2018	TD	Olive
		1	0	2	2018	TD	Olive
		1	0	2	2018	TD	Olive
		0	1	2	2018	TD	Olive
		1	0	2	2018	TD	Olive
		1	0	2	2018	TD	Olive
		1	0	2	2018	TD	Olive
		1	0	2	2018	TD	Olive
		0	1	2	2018	TD	Olive
		1	0	2	2018	TD	Olive
		1	0	2	2018	TD	Olive
		0	1	2	2018	TD	Olive
		1	0	2	2018	TD	Olive
		0	1	2	2018	TD	Olive
		0	1	2	2018	TD	Olive
		1	0	2	2018	TD	Olive
		1	0	2	2018	TD	Olive
		1	0	2	2018	TD	Olive
		1	0	2	2018	TD	Olive
		1	0	2	2018	TD	Olive
		1	0	2	2018	TD	Olive
		1	0	2	2018	TD	Olive
		1	0	2	2018	TD	Olive
		1	0	2	2018	TD	Olive
		1	0	2	2018	TD	Olive
		1	0	2	2018	TD	Olive
		1	0	2	2018	TD	Olive
		1	1	1	2018	TD	Olive
		1	0	1	2018	TD	Olive
		1	0	1	2018	TD	Olive
		1	0	1	2018	TD	Olive
		1	0	1	2018	TD	Olive
		1	0	1	2018	TD	Olive
		1	0	1	2018	TD	Olive
		1	0	1	2018	TD	Olive
		1	0	1	2018	TD	Olive
		1	0	1	2018	TD	Olive
		1	0	1	2018	TD	Olive
		1	0	1	2018	TD	Olive
		1	0	1	2018	TD	Olive
		1	0	1	2018	TD	Olive
		1	0	1	2018	TD	Olive
		1	0	1	2018	TD	Olive
		1	0	1	2018	TD	Olive
		1	0	1	2018	TD	Olive
		1	0	1	2018	TD	Olive
		1	0	1	2018	TD	Olive
		1	0	1	2018	TD	Olive
		1	0	1	2018	TD	Olive
		1	0	1	2018	TD	Olive
		1	0	1	2018	TD	Olive
		1	0	1	2018	TD	Olive
		1	0	1	2018	TD	Olive
		1	0	1	2018	TD	Olive
		1	0	1	2018	TD	Olive
		0	1	2	2019	TD	Olive
		1	0	2	2019	TD	Olive
		1	0	2	2019	TD	Olive
		1	0	2	2019	TD	Olive
		1	0	2	2019	TD	Olive
		0	1	2	2019	TD	Olive
		1	0	2	2019	TD	Olive
		1	0	2	2019	TD	Olive
		1	0	2	2019	TD	Olive
		1	0	2	2019	TD	Olive
		1	0	2	2019	TD	Olive
		1	0	2	2019	TD	Olive
		0	1	2	2019	TD	Olive
		0	1	2	2019	TD	Olive
		1	0	2	2019	TD	Olive
		1	0	2	2019	TD	Olive
		0	1	2	2019	TD	Olive
		1	0	2	2019	TD	Olive
		1	0	2	2019	TD	Olive
		0	0	2	2019	TD	Olive
		1	0	2	2019	TD	Olive
		1	0	2	2019	TD	Olive
		1	0	2	2019	TD	Olive
		1	0	2	2019	TD	Olive
		1	0	2	2019	TD	Olive
		1	0	2	2019	TD	Olive
		1	0	2	2019	TD	Olive
		1	0	2	2019	TD	Olive
		1	0	2	2019	TD	Olive
		1	0	2	2019	TD	Olive
		1	0	2	2019	TD	Olive
		1	0	2	2019	TD	Olive
		0	0	2	2019	TD	Olive
		1	0	2	2019	TD	Olive
		1	0	2	2019	TD	Olive
		0	1	1	2019	TD	Olive
		0	1	1	2019	TD	Olive
		0	1	1	2019	TD	Olive
		1	0	1	2019	TD	Olive
		0	1	1	2019	TD	Olive
		1	0	1	2019	TD	Olive
		1	0	1	2019	TD	Olive
		0	1	1	2019	TD	Olive
		0	1	1	2019	TD	Olive
		1	0	1	2019	TD	Olive
		0	1	1	2019	TD	Olive
		1	0	1	2019	TD	Olive
		1	0	1	2019	TD	Olive
		0	1	1	2019	TD	Olive
		1	0	1	2019	TD	Olive
		0	1	1	2019	TD	Olive
		1	0	1	2019	TD	Olive
		1	0	1	2019	TD	Olive
		1	0	1	2019	TD	Olive
		0	1	1	2019	TD	Olive
		1	0	1	2019	TD	Olive
		1	0	1	2019	TD	Olive
		1	0	1	2019	TD	Olive
		1	0	1	2019	TD	Olive
		0	1	1	2019	TD	Olive
		1	0	1	2019	TD	Olive
		1	0	1	2019	TD	Olive
		1	0	1	2019	TD	Olive
		1	0	1	2019	TD	Olive
		1	0	1	2019	TD	Olive
		0	1	1	2019	TD	Olive

## Sheet: Breeding chronology
		Dates		Breeding activities
		Weeks of the Month	Continuous Weeks	Nesting	Laying	Hatching
				Nests	Eggs	Chicks
		2004-03-01	1	0	0	0
		2001-04-01	2	0	0	0
		2002-04-01	3	0	0	0
		April-03	4	0	0	0
		April-04	5	12	0	0
		May-01	6	70	0	0
		May-02	7	85	40	0
		May-03	8	0	86	0
		2004-05-01	9	110	100	0
		June-01	10	120	140	4
		June-02	11	0	186	8
		June-03	12	0	0	10
		2004-06-01	13	0	0	60
		July-01	14	0	0	90
		July-02	15	0	0	142
		July-03	16	0	0	0
		Total	16	120	186	142

## Sheet: Breeding success (Failures)
	Phase	Construction of nests						Incubation of eggs							Rearing of chicks
	Parameter	Total of nests	Succeeded	Predated	Deserted	others	Destructed	Total of eggs	Succeeded	Predated	Deserted	Destructed	others	Unhatched	Total of chicks	Succeeded	Predated	Died	others	Deserted
	Number	120	93	9	11	0	7	186	142	30	10	0	0	4	142	133	8	1	0	0
	Estimation	Number (Parameter): Total (120)						Number (Parameter): Total (186)							Number (Parameter): Total (142)
	%	100	77.75	7.5	09.16	0	05.83	100	76.34	16.12	5.37	0	0	5.03	100	93.66	5.63	0.7	0	0
	Estimation	Only noted in the field (we don’t have exact estimations because some cases were incleare		Montpellier snake Malpolon monspessulanus	Disturbance by farmine prctices					Montpellier snake Malpolon monspessulanus	Disturbance by farmine prctices						Maghreb magpie (Pica mauritanica)
				horseshoe whip snake Hemorrhois hippocrepis	Use of pesticides					horseshoe whip snake Hemorrhois hippocrepis	Use of pesticides						horseshoe whip snake Hemorrhois hippocrepis
				Common kestrel Falco tinnunculus	cutting of branches					Common kestrel Falco tinnunculus	cutting of branches						Common kestrel Falco tinnunculus
				Black-winged kite Elanus caeruleus	irrigation					Black-winged kite Elanus caeruleus	irrigation
				Maghreb magpie (Pica mauritanica)						Black-winged kite Elanus caeruleus	cutting of branches
										Maghreb magpie (Pica mauritanica)
